# Supplementary material
Source: PubMed Central journal article supplement (PMC4004201)
Supplement: supp_bgt489_Bradley_Suppl_Figures_and_Table.pdf [file supp_bgt489_Bradley_Suppl_Figures_and_Table.pdf]

# Supplementary Figure 1

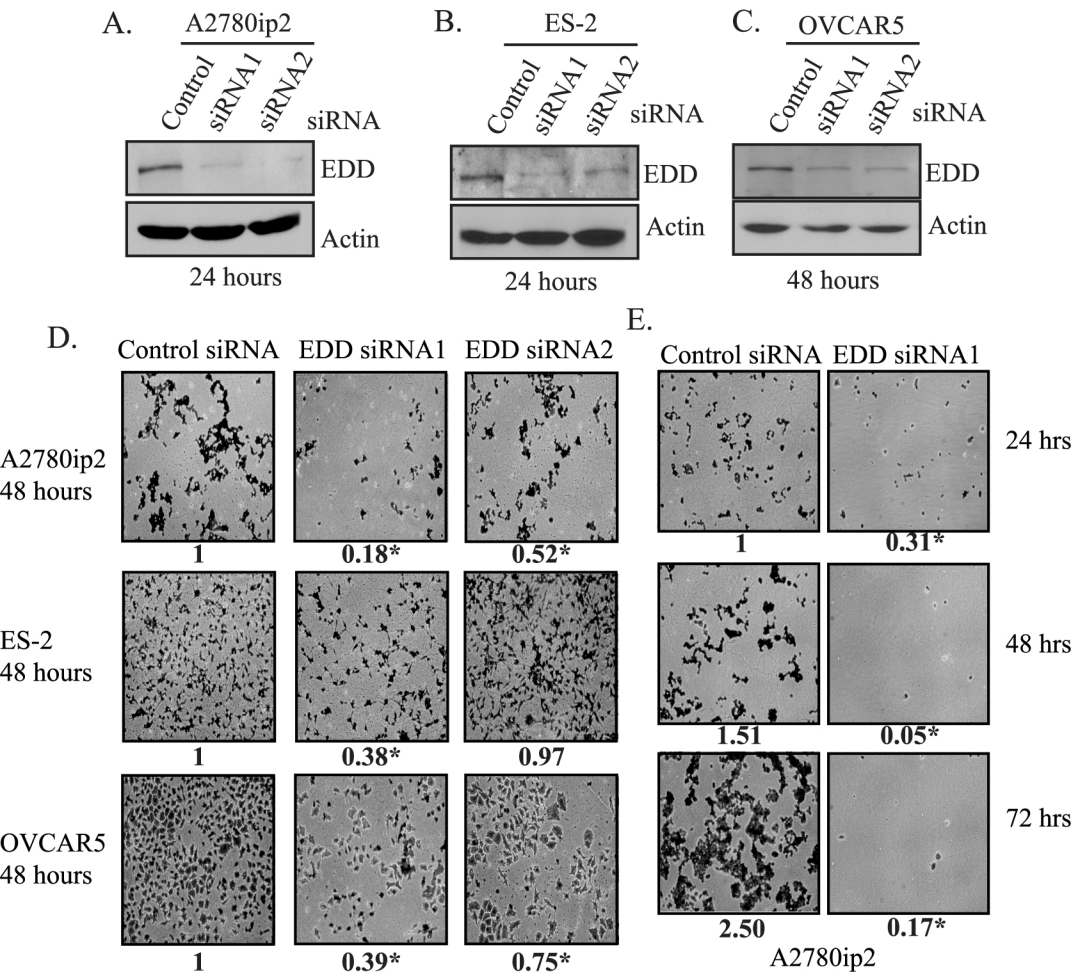

## Supplementary Figure 2

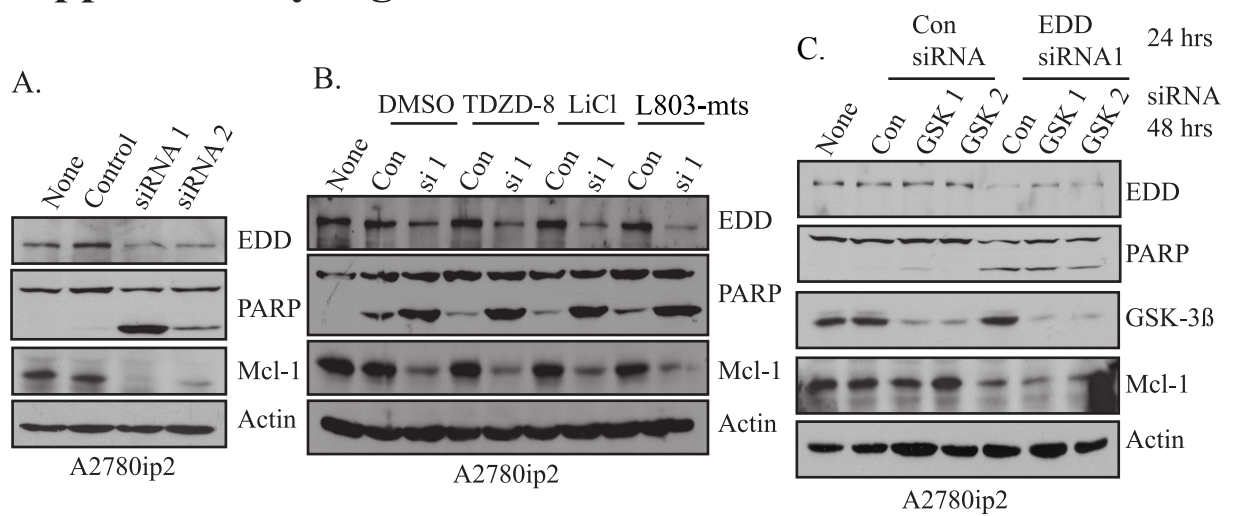

# Supplementary Figure 3

A. ES-2

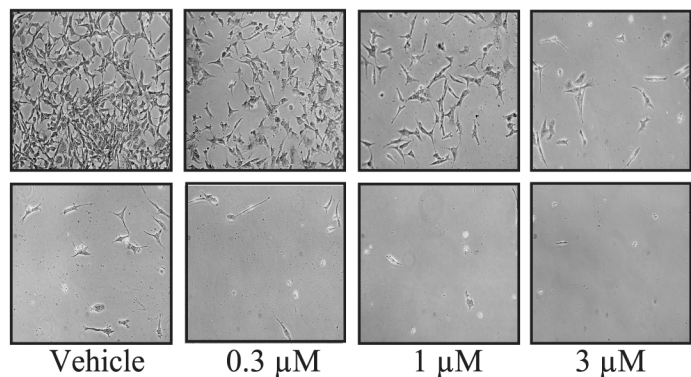

B. A2780ip2

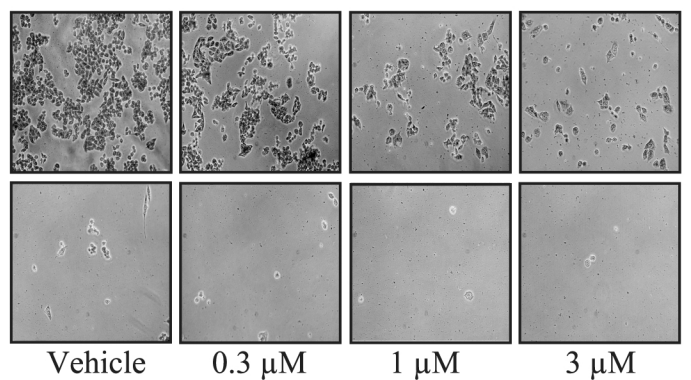

C.

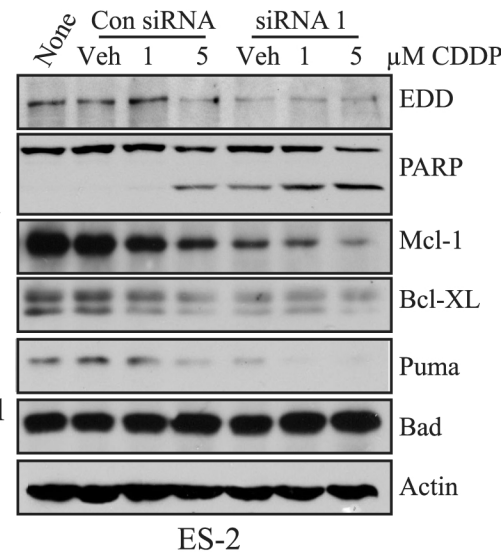

D.

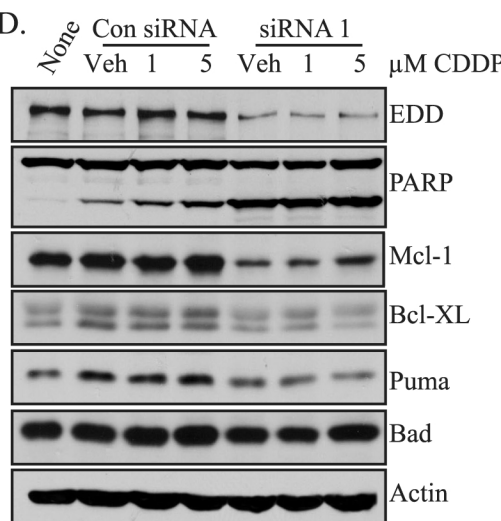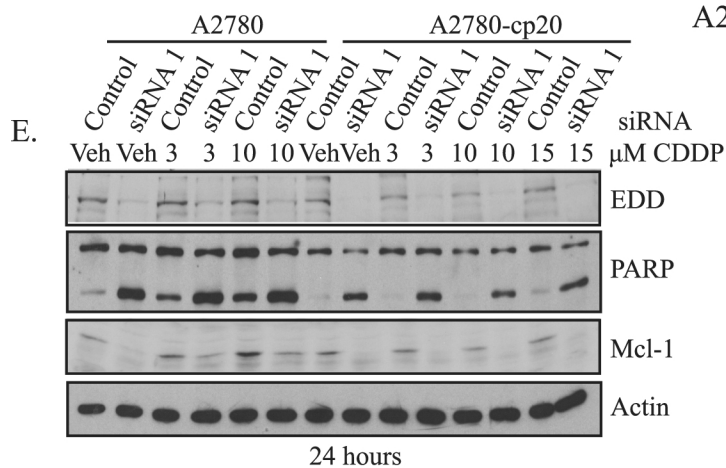

## Supplementary Figure 4

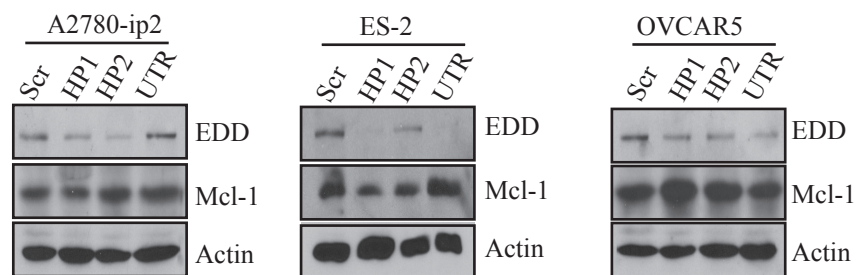



## Supplementary Figure 5

A.

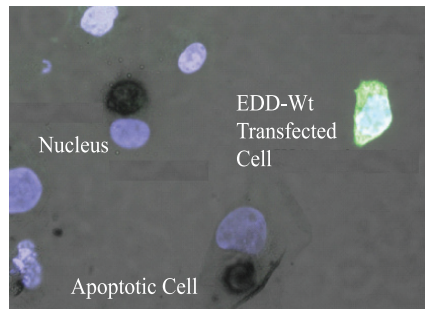

B.

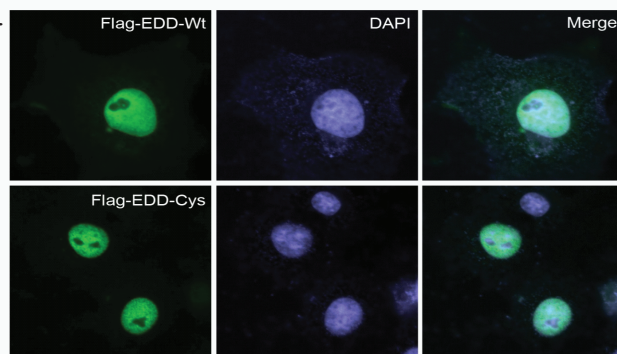

## Supplementary Figure 6

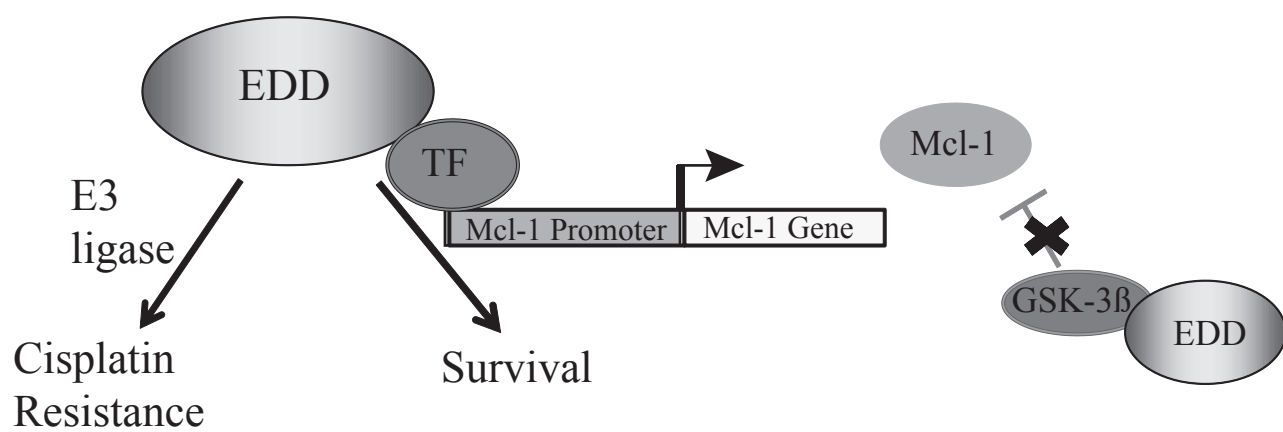

Supplementary Table 1

| <b>Ovarian Cell Line</b> | <b>IC<sub>50</sub> Cisplatin (μM)</b> | <b>Reference</b> |
|--------------------------|---------------------------------------|------------------|
| IOSE                     | 3.17                                  | 43               |
| A2780                    | 1.74                                  | 44               |
| ES-2                     | 48.8                                  |                  |
| OV2008                   | 1.72                                  | 45               |
| OVCAR3                   | 25.7                                  | 46               |
| OVCAR5                   | 5.02                                  | 44               |
| SKOV-3                   | 21.7                                  | 46               |
| TOV-21G                  | 18.5                                  | 46               |
